# Supplementary material for: Paraneoplastic immunoglobulin A nephropathy in a patient with lung adenocarcinoma: A case report and literature review
Source: PubMed Central journal article supplement — J Int Med Res. 2021 Apr 29;49(4):0300060521996868. doi: 10.1177/0300060521996868 (PMC8113932; doi:10.1177/0300060521996868), 2021-04-29
Supplement: sj-pdf-1-imr-10.1177_0300060521996868.pdf [file sj-pdf-1-imr-10.1177_0300060521996868.pdf]

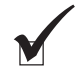

| Topic                               | Item | Checklist item description                                                                             | Reported on Line                                                    |
|-------------------------------------|------|--------------------------------------------------------------------------------------------------------|---------------------------------------------------------------------|
| <b>Title</b>                        | 1    | The diagnosis or intervention of primary focus followed by the words “case report”                     | line1                                                               |
| <b>Key Words</b>                    | 2    | 2 to 5 key words that identify diagnoses or interventions in this case report, including "case report" | line22-23                                                           |
| <b>Abstract<br/>(no references)</b> | 3a   | Introduction: What is unique about this case and what does it add to the scientific literature?        | line14-15                                                           |
|                                     | 3b   | Main symptoms and/or important clinical findings                                                       | line14-16                                                           |
|                                     | 3c   | The main diagnoses, therapeutic interventions, and outcomes                                            | line16-20                                                           |
|                                     | 3d   | Conclusion—What is the main “take-away” lesson(s) from this case?                                      | line20-21                                                           |
| <b>Introduction</b>                 | 4    | One or two paragraphs summarizing why this case is unique ( <b>may include references</b> )            | line24-34                                                           |
| <b>Patient Information</b>          | 5a   | De-identified patient specific information.                                                            | line37                                                              |
|                                     | 5b   | Primary concerns and symptoms of the patient.                                                          | line37-38                                                           |
|                                     | 5c   | Medical, family, and psycho-social history including relevant genetic information                      | line37-40                                                           |
|                                     | 5d   | Relevant past interventions with outcomes                                                              | line42-44                                                           |
| <b>Clinical Findings</b>            | 6    | Describe significant physical examination (PE) and important clinical findings.                        | line45-53                                                           |
| <b>Timeline</b>                     | 7    | Historical and current information from this episode of care organized as a timeline                   | line45-62                                                           |
| <b>Diagnostic<br/>Assessment</b>    | 8a   | Diagnostic testing (such as PE, laboratory testing, imaging, surveys).                                 | line45-52                                                           |
|                                     | 8b   | Diagnostic challenges (such as access to testing, financial, or cultural)                              | line63-64                                                           |
|                                     | 8c   | Diagnosis (including other diagnoses considered)                                                       | line56-59                                                           |
|                                     | 8d   | Prognosis (such as staging in oncology) where applicable                                               | line59-62                                                           |
| <b>Therapeutic<br/>Intervention</b> | 9a   | Types of therapeutic intervention (such as pharmacologic, surgical, preventive, self-care)             | line63-64                                                           |
|                                     | 9b   | Administration of therapeutic intervention (such as dosage, strength, duration)                        | line64                                                              |
|                                     | 9c   | Changes in therapeutic intervention (with rationale)                                                   | line64                                                              |
| <b>Follow-up and<br/>Outcomes</b>   | 10a  | Clinician and patient-assessed outcomes (if available)                                                 | line64-67                                                           |
|                                     | 10b  | Important follow-up diagnostic and other test results                                                  | line67-69                                                           |
|                                     | 10c  | Intervention adherence and tolerability (How was this assessed?)                                       | line66-69                                                           |
|                                     | 10d  | Adverse and unanticipated events                                                                       |                                                                     |
| <b>Discussion</b>                   | 11a  | A scientific discussion of the strengths AND limitations associated with this case report              | line74-77                                                           |
|                                     | 11b  | Discussion of the relevant medical literature <b>with references</b> .                                 | line81-100                                                          |
|                                     | 11c  | The scientific rationale for any conclusions (including assessment of possible causes)                 | line101-127                                                         |
|                                     | 11d  | The primary “take-away” lessons of this case report (without references) in a one paragraph conclusion | line128-132                                                         |
| <b>Patient Perspective</b>          | 12   | The patient should share their perspective in one to two paragraphs on the treatment(s) they received  | line125-126                                                         |
| <b>Informed Consent</b>             | 13   | Did the patient give informed consent? Please provide if requested                                     | Yes <input checked="" type="checkbox"/> No <input type="checkbox"/> |

在此处键入文本
