# Supplementary material for: Paraneoplastic immunoglobulin A nephropathy in a patient with lung adenocarcinoma: A case report and literature review
Source: PubMed Central journal article supplement — J Int Med Res. 2021 Apr 29;49(4):0300060521996868. doi: 10.1177/0300060521996868 (PMC8113932; doi:10.1177/0300060521996868), 2021-04-29
Supplement: sj-pdf-2-imr-10.1177_0300060521996868.pdf [file sj-pdf-2-imr-10.1177_0300060521996868.pdf]

This document certifies that the manuscript

**Paraneoplastic immunoglobulin A nephropathy in a patient with lung adenocarcinoma: A case report and literature review**

prepared by the authors

**Jing Wang, Yang Liu, Nian Liu, Menghan Gao, Hang Yuan.**

was edited for proper English language, grammar, punctuation, spelling, and overall style by one or more of the highly qualified native English speaking editors at AJE.

This certificate was issued on **August 11, 2020** and may be verified on the [AJE website](#) using the verification code **EE63-8D8A-A001-5ED2-B9DC**.

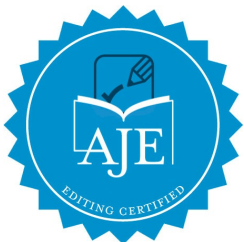

Neither the research content nor the authors' intentions were altered in any way during the editing process. Documents receiving this certification should be English-ready for publication; however, the author has the ability to accept or reject our suggestions and changes. To verify the final AJE edited version, please visit our verification page at [aje.com/certificate](#). If you have any questions or concerns about this edited document, please contact AJE at [support@aje.com](mailto:support@aje.com).
